# Supplementary material for: TRF2 and VEGF-A: an unknown relationship with prognostic impact on survival of colorectal cancer patients
Source: J Exp Clin Cancer Res. 2020 Jun 15;39:111. doi: 10.1186/s13046-020-01612-z (PMC7294609; doi:10.1186/s13046-020-01612-z)
Supplement: Supplementary file 2 — Additional file 2:Supplementary Table S2. List of mutations detected by NGS analysis in our patients’ dataset [file 13046_2020_1612_MOESM2_ESM.xlsx]

## Sheet: Foglio1
Supplementary Table S2 – List of mutations detected by NGS analysis in our patients' dataset
Patients ID	Mutations	KRAS	TP53 (1)	TP53 (2)	TP53 (3)	APC (1)	APC (2)	APC (3)	PiK3Ca (1)	PiK3Ca (2)	PiK3Ca (3)	c-KIT (1)	c-KIT (2)	KDR	JAK3	BRAF	FBXW7	RET	CTNNB1	SMAD4 (1)	SMAD4 (2)	HRAS	IDH2	MET	PDGFRA	AKT1	IDH1	ATM	SMARCB1 (1)	SMARCB1 (2)	PTEN (1)	PTEN (2)	NRAS	FGFR3	PTPN11	FGFR1	GNAQ	RB1	EGFR	FLT3	SMO	ERBB4	ERBB2	ABL1	CDKN2A
SS 1	KRAS, TP53	G12C	R282W
SS 2	APC, TP53, PIK3CA, KDR, ATM		R273C			A1582P			I391M					Q472H														F858L
SS 3	TP53, PiK3Ca		P250L						H1047R
SS 4	KRAS, APC, TP53 (3)	G13D	R174-H178del	C176R	R175P	S1356*
SS 5	KRAS, PiK3Ca (2)	G12C							E542K	I391M
SS 6	KRAS, SMAD4, KDR	G12V												Q472H						R445*
SS 7	KRAS, PIK3CA (2)	G12A							E545K	I391M
SS 8	KRAS, KIT, JAK3	A146V										M541L			V722I
SS 9	KRAS, APC, TP53, KDR	G12S	P151S			K1310fs								Q472H
SS 10	APC (2), PIK3CA, IDH1					R1114*			E453K																		R132C
SS 11	BRAF,KIT,KDR											M541L		Q472H		V600E
SS 12	ATM																											R2433*
SS 13	KRAS, APC, PIK3CA, JAK3	G12D				R1450fs			I391M						V722I
SS 14	KRAS, APC,KIT, KDR, PiK3Ca (3)	G12C				R876*			K111E	I391M	Q546K	M541L		Q472H
SS 15	APC, TP53, KDR		R282W			A1299fs								Q472H
SS 16	KRAS, JAK3	G12D													V722I
SS 17	PiK3Ca								E545K
SS 18	APC, TP53, KDR, SMARCB1		Y103fs			E1309fs*4								Q472H															T72K
SS 19	APC, BRAF, PiK3Ca, PTEN					R1114*			H1047R							N581I															R173L
SS 20	KRAS, KIT, PiK3Ca (2)	G12A							E542K	I391M		M541L
SS 21	KRAS, FBXW7	G12V															R505C
SS 22	KRAS, JAK3	G12D													V722I
SS 23	KDR													D276E
SS 24	KRAS, FGFR1	G12D																																		R281W
SS 25	APC, TP53, KIT, KDR, JAK3, SMARCB1		R248Q			K1310*						M541L		Q472H	V722I														T72K
SS 26	PDGFRa, KDR													Q472H											D568N
SS 27	KRAS,TP53,RET	G12D	R196*															V778I
SS 28	KRAS, APC, KIT, PiK3Ca (2)	G12V				E1309*			E453K	I391M		M541L
SS 29	TP53, APC, KIT, KDR		N131del			E1306fs						M541L		Q472H
SS 30	KIT											M541L
SS 31	TP53, BRAF, PiK3Ca		E339*						I391M							V600E
SS 32	KRAS, APC, PiK3Ca	G12D				Q1447fs*26			I391M
SS 33	KRAS, KDR, FBXW7, CTNNB1	G12V												Q472H			R278*		S45F
SS 34	KRAS, APC (2), FBXW7, KDR	G13D				R1450*	E1317Q							Q472H			R465H
SS 35	JAK3, IDM1														V722I												R132C
SS 36	KRAS, APC (2)	G12V				E1379*	Y863*
SS 37	KRAS, APC, TP53, KDR, SMARCB1	G12D	R248Q			S1315*								Q472H															T72K
SS 39	APC (2), TP53, PIK3CA, KDR		T211fs			R1114*	Q1367*		I391M					Q472H
SS 41	KRAS, APC, PiK3Ca (2)	G13D				Q1291*			E542K	I391M
SS 42	KRAS,TP53, FBXW7	G12D	R306*														T385R
SS 43	BRAF, AKT1															V600E										E17K
SS 44	KRAS, APC, FBXW7, SMAD4	G12D				E1353*											H460Y			Q256*
SS 45	HRAS																					Q61K
SS 46	TP53		R175H
SS 47	TP53, APC, KIT, PiK3Ca		R273C			R1450*			V344G			M541L
SS 48	Wild Type
SS 49	KRAS, APC, MET, IDH2, PiK3Ca	G13D				R1450fs			E545K														R172S	V378I
SS 50	APC, TP53, KIT		R248Q			H1375fs						M541L
SS 51	TP53		M243fs
SS 52	APC, NRAS, KDR					Q1444fs								Q472H																			Q61R
SS 55	KRAS, TP53, KDR	G12V	R273H											Q472H
SS 56	KRAS, ATM	G13D																										R3008H
SS 58	KRAS, APC, FGFR1, SMARCB1	Q61R				R1450*																							T72K							S157F
SS 59	KRAS, APC, KIT, KDR	G12D				E1309fs*4						M541L		Q472H
SS 60	APC,TP53, KDR		C135F			K1310fs								Q472H
SS 61	KIT, MET											M541L												N375S
SS 62	KRAS, APC, TP53	G12V	R273H			E1464fs
SS 63	TP53, MET		C238Y																					H1112Y
SS 64	TP53, APC, PDGFRA		R248W			S1356*																			D691N
SS 65	NRAS																																Q61R
SS 66	APC, BRAF, PiK3Ca (2)					E1464fs			E542K	E453K						V600E
SS 67	KRAS, TP53, APC, KDR, PiK3Ca, MET	G12C	Y320C			E1309fs			E545K					Q472H										T1010I
SS 68	APC, TP53, ERBB4		L257M			A135fs																																				C589Y
SS 69	KRAS, APC, TP53, FBXW7	G12V	R248W			L1488fs											R465H
SS 70	APC					P1361fs
SS 71	KRAS, KDR, PiK3Ca	G12C							I391M					Q472H
SS 72	APC, CTNNB1, TP53, ATM, JAK3		R248Q			Q1378*									V722I				L31V									P604S
SS 73	KRAS	G12D
SS 74	APC, KDR, PiK3Ca (2)					F1491fs			H1047R	I391M				Q472H
SS 75	APC, TP53, PiK3Ca		R248W			E1309fs			I391M
SS 76	APC, SMAD4, KDR					Q1294ter								Q472H						R361H
SS 77	KRAS, KIT	G12V										M541L
SS 78	KRAS, TP53, SMAD4, PDGFRA	G13D	R342*																	M503T					G569R
SS 79	APC, TP53, PiK3Ca, KDR, ATM		I251F			S1465fs*9			E545G					Q472H														F858L
SS 80	KRAS, APC, ATM, SMARCB1	G13D				R1114*																						F858L	T72K
SS 81	NRAS, APC (1), TP53, PiK3Ca, PDGFRA		C135Y			Q1291*	E1317Q		I391M																H570Y								Q61K
SS 82	KRAS, KDR	G12D												Q472H
SS 84	APC					E1309fs
SS 85	KRAS, APC, TP53	G12C	R175H			E1309fs
SS 86	KRAS, PIK3CA	Q61L							E545K
SS 87	KRAS, APC, SMAD4 (2), FBXW7, PiK3CA, KDR	G12D				R1450*			H1047R					Q472H			R505C			R445*	D424N
SS 88	KRAS, SMAD4	G12V																		R361C
SS 89	KRAS, TP53, APC, ATM	G12V	G244D			S1465fs																						P604S
SS 90	APC, P53, GNAQ		G266E			E1374*																															Q209K
SS 91	APC, KRAS, PIK3CA, SMAD4, KDR	G12C				K1363fs			I391M					Q472H						W101C
SS 92	APC, cKIT					G1288*						M541L
SS 93	TP53, KIT, JAK3, GNAQ		L265del									M541L			V722I																						Q209K
SS 94	KRAS, TP53 (2), GNAQ	G13D	G266E	V197M																																	Q209K
SS 95	KRAS, TP53, APC, PiK3Ca (2), JAK3	G12D	R273H			E1345*			H1047L	I391M					V722I
SS 96	KRAS, cKIT, SMARCB1 (2)	G12D										M541L																	R40Q	R158*
SS 98	KRAS, PiK3Ca, cKIT, SMARCB1	A146T							V346G			M541L																	T72K
SS 99	APC, PiK3Ca (2), KDR, KIT					I1287fs			Q546R	I391M		M541L		Q472H
SS 100	APC, TP53, PTPN11		R248Q			E1353*																													E76K
SS 101	KRAS, APC, TP53, PIK3CA, PTEN, KIT (2)	G13D	R342*			L1506fs			A1066T			V569I	S645N																		G165R
SS 102	KRAS, KDR	G12V												Q472H
SS 103	APC, TP53, FBXW7		R273H			Q1294*											R278*
SS 104	KRAS, FBXW7, ATM	G12D															R465L											A1309T
SS 105	NRAS																																G12D
SS 106	APC, TP53, PiK3Ca, ATM, GNAQ		R196*			Q1294*			I391M																			P411R									Q209K
SS 107	APC, TP53, PiK3Ca, SMAD4,GNAQ		R248W			E1353*			I391M											P511L																	Q209K
SS 109	TP53, KDR		R213L											Q472H
SS 111	BRAF, PiK3Ca, GNAQ								Q546K							V600E																					Q209K
SS 114	KRAS, PiK3Ca, RB1	G12V							N545I																													L326F
SS 116	APC, KDR, FBXW7					1286fs								Q472H			W446*
SS 118	KRAS, CTNNB1, KDR, FGFR3	A146T												Q472H					T41A															V642A
SS 119	KRAS, KDR	G13D												Q472H
SS 120	KRAS PIK3CA, SMAD4, KDR, KIT	A146T							H1047L			M541L		Q472H						E526V
SS 121	CTNNB1, P53, KDR, RB1		R175H											Q472H					D32G																			E137*
SS 122	NRAS, APC, TP53, KDR		R282W			I1307k								Q472H																			Q61H
SS 123	APC, TP53		R175H			E1309fs
SS 124	APC, TP53, MET		R273H			Q1367*																		N375S
SS 125	APC, TP53, KIT		Q192-L194del			Q1444*						V532I
SS 126	KRAS, cKIT, AKT1, SMAD4	G13D										M541L								A454T						D44N
SS 127	APC (2), TP53, PIK3CA, KDR		V197M			Q1429*	R876*		G414R					Q472H
SS 128	KRAS, TP53, PIK3CA, ATM, PDGFRA	G12A	H179D						I391M																P567L			F858L
SS 129	BRAF, PIK3CA, FBXW7								I391M							V600E	R441Q
SS 130	APC, TP53, ATM, PTPN11		R306*			A1582P																						Q2874*							G503 E
SS 131	KRAS,KDR, FLT3, RB1, TP53, SMAD4	G12D	R267Q											Q472H						G255S																		R320*		Q580*
SS 132	TP53, KDR		R248Q											Q472H
SS 133	TP53		R213*
SS 134	FBXW7, KDR													Q472H			R505C
SS 135	KRAS, SMAD4, PTEN (2)	A146T																		R361C											D109E	N117I
SS 136	SMAD4, FBXW7																H5800R			D351Y
SS 137	TP53, PIK3CA, KIT		R249W						I391M			M541L
SS 138	APC, TP53, PiK3Ca (2)		R248Q			E1317*			K111E	I391M
SS 139	APC, TP53, KDR		R342*			E1309fs								Q472H
SS 140	PIK3CA								E545K
SS 141	APC (2), PTEN, PDGFRA, IDH2, PIK3CA, KDR, ATM					R1450*	V1452I		V344G					Q472H									G137R		G569E			H2887Y			I8fs
SS 142	KRAS, APC	G12A				E1309fs
SS 143	KRAS, APC (2), PIK3CA, PDGFRA, EGFR	G12V				R1450*	Q1447*		H1047L																G569E														A289V
SS 144	KRAS, PDGFRA, FLT3, SMAD4	G12C																		S144L					E571K															R595K
SS 145	KRAS, APC, PDGFRA, TP53	G12D	R342*			Q1429*																			D568N
SS 146	TP53 (2), BRAF, PTEN, PIK3CA, KIT, SMO		I195F	V157A					E545A			M541L				V600E															V175E										P220S
SS 147	KRAS, APC (2), TP53, PIK3Ca (2), KIT	G12V	R248W			Q1429*			E545K	I391M		M541L
SS 148	KRAS, APC (2), TP53, ABL1, KDR	G12V	P82A			S1465fs								Q472H																												K247R
SS 149	KRAS, APC	G12V				E1317Q
SS 150	TP53, PDGFRA		R158H																						E571K
SS 151	PTEN, KDR, JAK3													Q472H	V722I																S338fs
SS 152	BRAF															V600E
SS 153	KRAS, APC (2), PIK3CA, ATM, MET	Q61H				R1450*			I391M															R988C				A2688V
SS 154	APC, EGFR, SMO, PTEN, IDH2, ERBB2					Q1378*																	G137R								T167I								R748K		R628W		T862A
SS 155	KRAS, APC, PiK3Ca, KDR	G12V				E1309fs*4			H1047R					Q472H
SS 156	KRAS, TP53, PiK3Ca (2)	G12C	G245S						E545K	I391M
SS 160	APC, PDGFRA					T1301fs																			G569E
SS158	APC, PIK3CA, KIT, KDR					E1464fs			I391M			M541L		Q472H
SS 161	KRAS, TP53 (2), PiK3Ca, KDR, FBXW7	G12D	G105V	Q100*					I391M					Q472H			K286*
SS 162	KRAS, APC, FGFR1	Q61H				K1359fs																														D160N
SS 163	APC, NRAS					V1320fs																											G12D
SS 164	KRAS	G12D
SS 165	APC, TP53, KDR, cKIT, FGFR3		R282W			E1286*						M541L		Q472H																				F384L
SS 166	KRAS, TP53, KDR	G12D	P278L											Q472H
SS 168	APC (2), KDR					R1450*								Q472H
SS 169	TP53 (2), KDR, FGFR3		R290fs	P278L										Q472H																				A369V
SS 171	KRAS, APC, KDR	G13D				I1557*								Q472H
SS 172	APC, PIK3CA, KDR, MET					E1309fs			I391M					Q472H										N375S
SS 173	KRAS, KDR	G13D												Q472H
SS 174	TP53, PIK3CA, FGFR3, KDR		D281H						P421L					Q472H																				S780F
SS 175	APC (3), KDR, AKT1, SMARCB1					S1465fs	R876*	A1582P						Q472H												E17K			T72K
SS 176	TP53, BRAF,PiK3Ca, MET		R158H						E109del							D594A								T1010I
SS 178	ERBB2, KDR, SMARCB1													Q472H															T72K														G776V
SS 179	BRAF, KIT, KDR											M541L		Q472H		V600E
SS 180	PIK3CA, KDR, FBXW7, CDKN2a								E545K					Q472H			R505S																												M54I
SS 181	TP53		R273C
SS 182	KRAS, APC (2), PIK3CA, KDR	G12R				S1465fs*9	Q1096*		I391M					Q472H
SS 184	KRAS,TP53	G12V	V197E
SS 185	KRAS, PTPN11, KIT, SMAD4	G12D										M541L								A118V															V490I
SS 185	KRAS, TP53, FBXW7, KDR	G13D	R290H											Q472H			R479G
AA_position_AA: substitution; fs: frame shift; *: termination; *position: position new termination site; AA_position-AA_position: range
